# Supplementary material for: Sweet potato-derived carbon nanoparticles as anode for lithium ion battery
Source: Royal Society of Chemistry journal article supplement (doi:10.1039/c5ra03482e), 2015-01-01
Supplement: c5ra03482e1.pdf [file c5ra03482e1.pdf]

## Supporting Materials

### **Sweet Potato-derived Carbon Nanoparticles as Anode for Lithium Ion Battery**

Peng Zheng, †\* Ting Liu, † Jinzheng Zhang, † Lifeng Zhang, † Yi Liu, † Jianfeng Huang, † and Shouwu Guo, † ‡\*

† School of Materials Science and Engineering, Shaanxi University of Science and Technology, Xi'an 710021, P.R.China.

‡ Key Laboratory for Thin Film and Microfabrication of the Ministry of Education, Research Institute of Micro/Nano Science and Technology, Shanghai Jiao Tong University, Shanghai 200240, P.R.China.

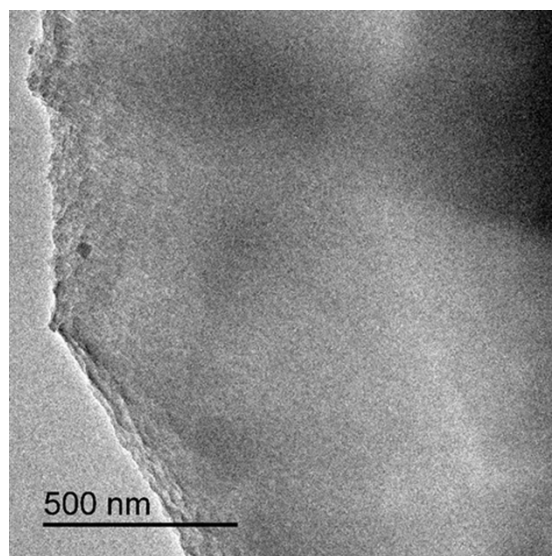

**Figure S1.** TEM image of DPC.

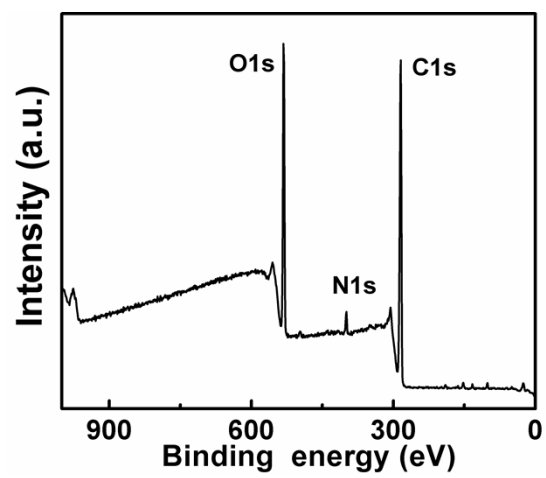

**Figure S2.** XPS general spectrum of pristine sweet potato powder.

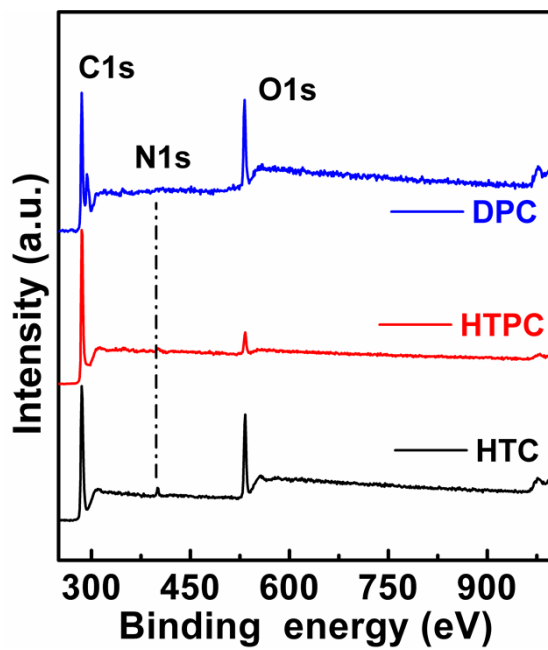

**Figure S3.** XPS general spectrum of HTC, HTPC and DPC.

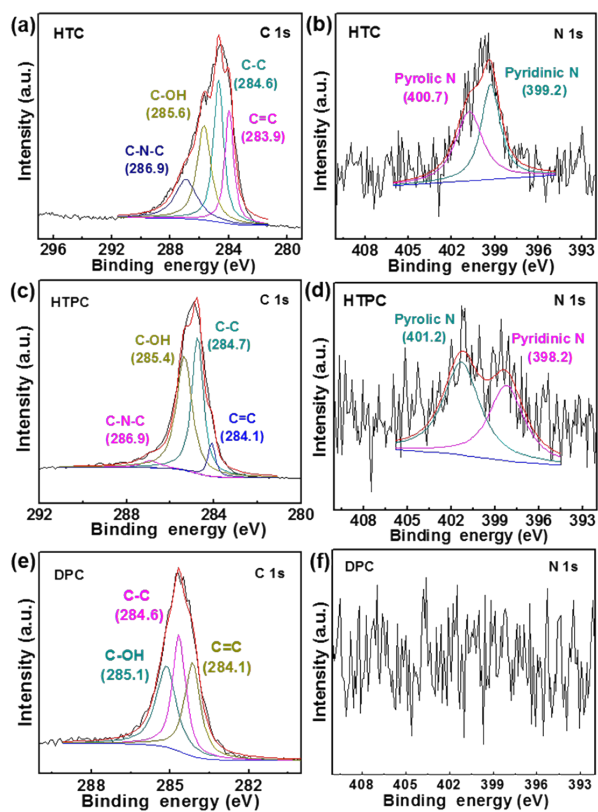

**Figure S4.** (a-b) high resolution C1s and N1s XPS spectra for HTC, (c-d) high resolution C1s and N1s XPS spectra for HTPC, (e-f) high resolution O1s XPS spectra for DPC.

**Table S1:** The yields of HTC, HTPC and DPC.

|      | Raw Material (g) | Product (g) | Productive Rate (%) |
|------|------------------|-------------|---------------------|
| HTC  | 10               | 0.352       | 3.52                |
| HPTC | 10               | 0.12        | 1.20                |
| DPC  | 10               | 0.984       | 9.84                |

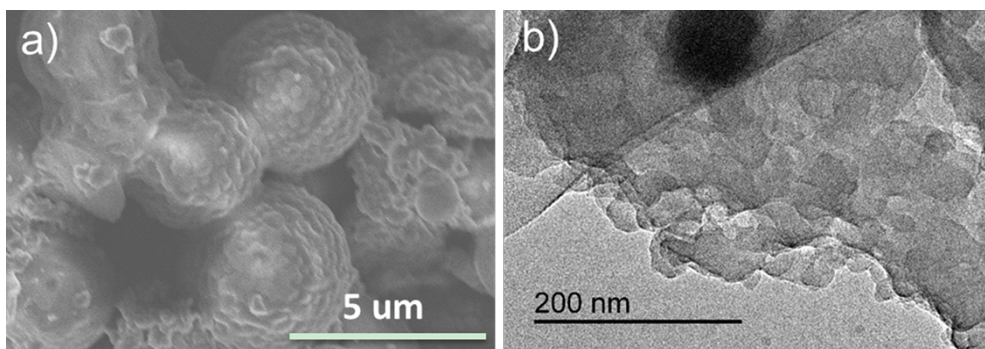

**Figure S5.** (a) SEM image of HTC, (b) TEM image of HTC.

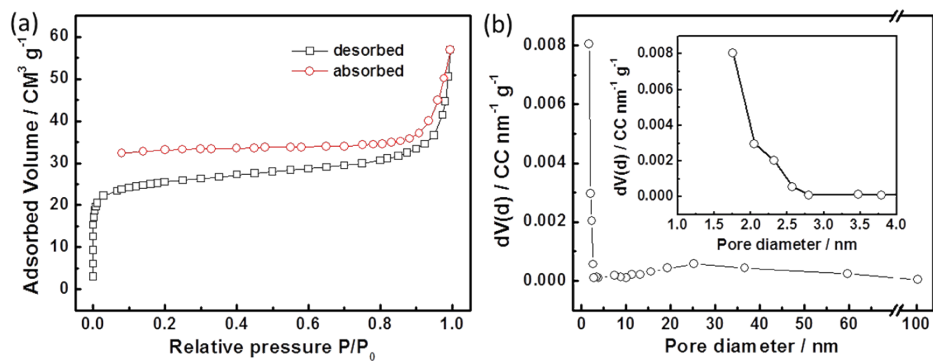

**Figure S6.** (a) Nitrogen adsorption-desorption isotherms and (b) the corresponding DFT pore size distributions of HTPC, the inset is the enlarged image of the DFT.
